# Supplementary material for: Phosphate Dosing in Drinking Water Distribution Systems Promotes Changes in Biofilm Structure and Functional Genetic Diversity
Source: PubMed Central journal article supplement (PMC7773730; doi:10.3389/fmicb.2020.599091), 2020-12-17
Supplement: Image_2.pdf [file Image_2.pdf]

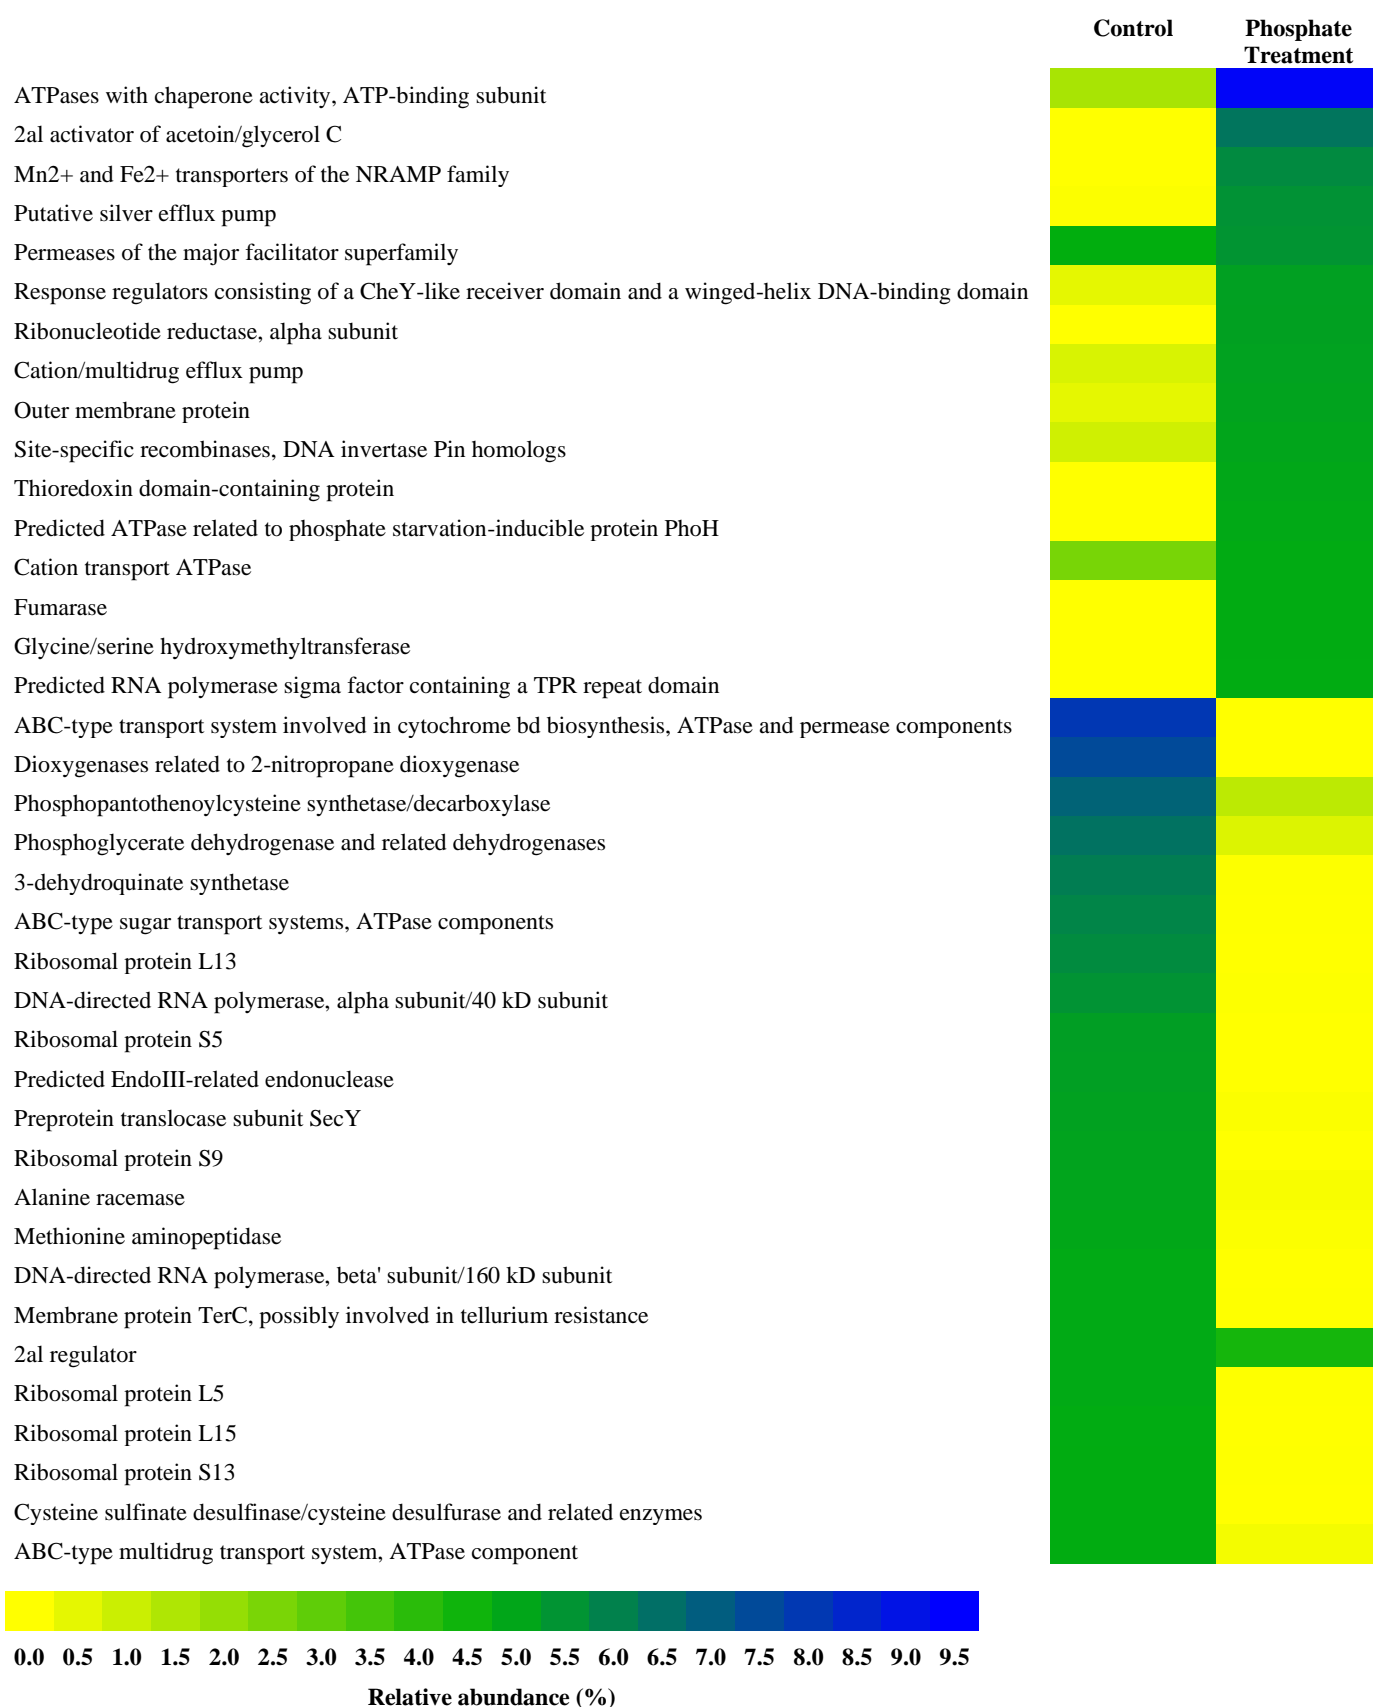

**Supplementary Figure 2: Relative abundance of specific functional annotated categories in samples from control and phosphate treatment cases with a high proportion.** *It is shown the average of n = 3 in each studied case.*
